# Supplementary material
Source: PubMed Central journal article supplement (PMC2897909)

**Supplementary Table 1: Yeast strains used in this study**

| Strain        | Background            | Genotype                                                                                                                                                                                | Reference               |
|---------------|-----------------------|-----------------------------------------------------------------------------------------------------------------------------------------------------------------------------------------|-------------------------|
| <b>SH1020</b> | W303                  | <i>MATa/MATα ade2/ade2 can1:ADE2:CAN1 /can1:ADE2:CAN1 his3-11,15/his3-11,15 leu2-3,112/LEU2 lys2(3'Δ):HIS3:lys2(5'Δ)/LYS2 trp1-1 / trp1-3'Δ ura3-1 / ura3-1</i>                         | Lee & Honigberg (1996)  |
| <b>SH2533</b> | Σ1278b                | <i>MATa/MATα ura3-52/ura3-52 his3::hisG/HIS3 leu2::hisG/leu2::hisG Yep24</i>                                                                                                            | Palacek et al (2000)    |
| <b>SH561</b>  | SK1                   | <i>MATa/MATα ade3/ADE3 ARG6/arg6 gal80::LEU2/gal80::LEU2 his4-G/his4-N ho::LYS2/ho::LYS2 leu2::hisG/ leu2::hisG lys2/lys2 trp1::hisG/trp1::hisG ura3/ura3</i>                           | Smith et al (1990)      |
| <b>SH4325</b> | SK1                   | <i>MATa/MATα ade3/ADE3 ARG6/arg6 gal80::LEU2/gal80::LEU2 his4-G/his4-N ho::LYS2/ho::LYS2 leu2::hisG/ leu2::hisG lys2/lys2 trp1::hisG/trp1::hisG ura3/ura3 flo11Δ:URA3 / flo11Δ:URA3</i> | this study              |
| <b>YPS128</b> | Wild <i>S. cerev.</i> | <i>MATa/MATα</i>                                                                                                                                                                        | Sniegowski et al (2000) |
| <b>YPS133</b> | Wild <i>S. cerev.</i> | <i>MATa/MATα</i>                                                                                                                                                                        | Sniegowski et al (2000) |
| <b>YPS138</b> | Wild <i>S. para.</i>  | <i>MATa/MATα</i>                                                                                                                                                                        | Sniegowski et al (2000) |
| <b>YPS145</b> | Wild <i>S. para.</i>  | <i>MATa/MATα</i>                                                                                                                                                                        | Sniegowski et al (2000) |

# Supplementary Figure S1

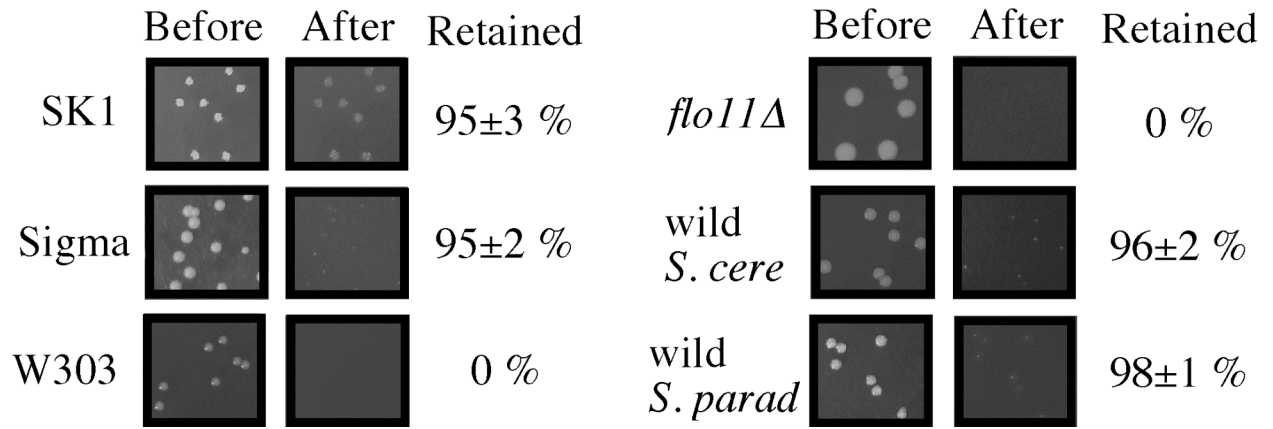

1

# Supplementary Fig. S2

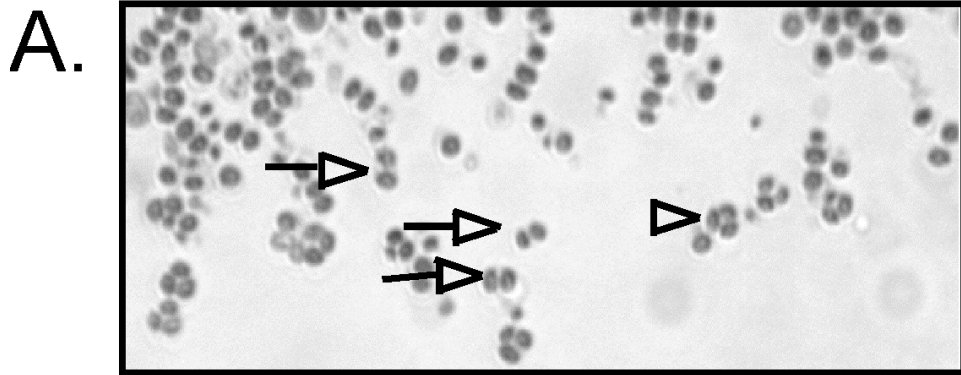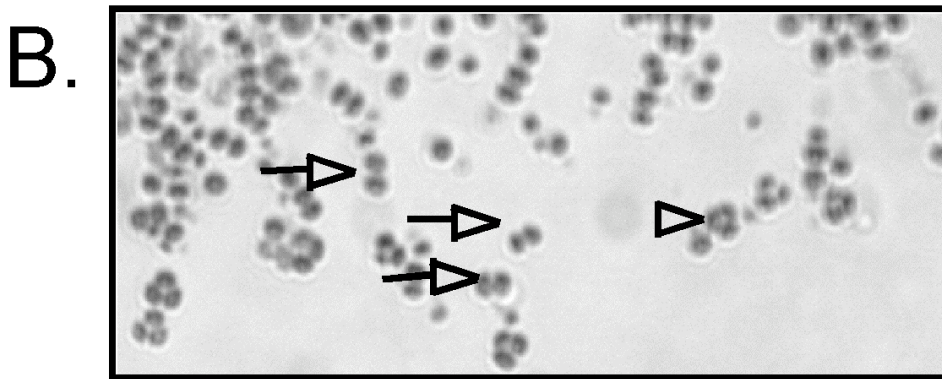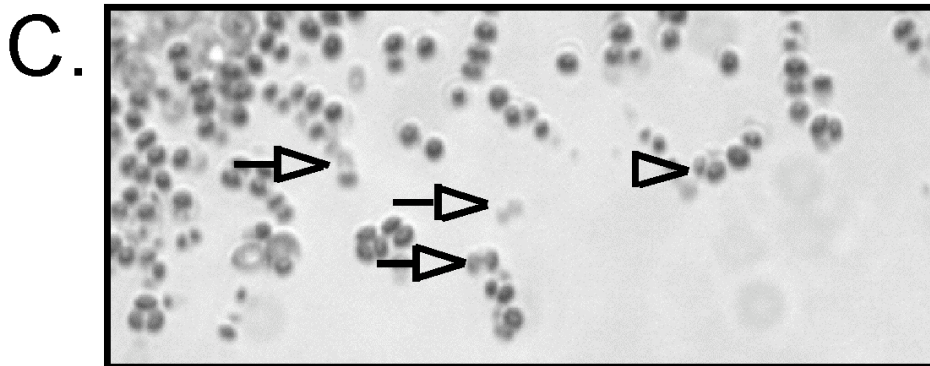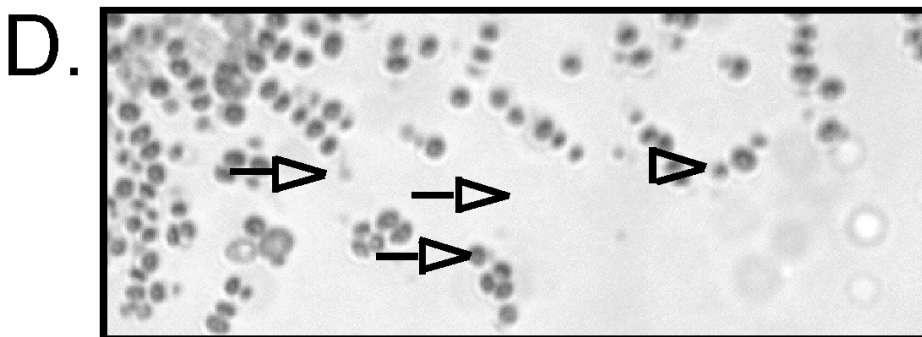

Supplement: NIHMS201015-supplement-01.pdf [file NIHMS201015-supplement-01.pdf]
